# Supplementary material for: Residue and Risk Assessment of Fluopyram in Carrot Tissues
Source: MDPI journal article supplement (doi:10.3390/molecules27175544), 2022-08-29
Supplement: s1 [file s1]

**Table S1.** Residues of fluopyram in soil.

|                      |          | Residues $\pm$ SD (mg/kg) |                               |                               |                               |                               |
|----------------------|----------|---------------------------|-------------------------------|-------------------------------|-------------------------------|-------------------------------|
| Days after Treatment |          | Untreated Control         | Root Irrigation               |                               | Foliar Spray                  |                               |
|                      |          |                           | Treatment at 250.00 g a.i./ha | Treatment at 500.00 g a.i./ha | Treatment at 250.00 g a.i./ha | Treatment at 500.00 g a.i./ha |
| 0                    | (10 min) | ND                        | 5.34 $\pm$ 0.96               | 14.46 $\pm$ 3.95              | 0.18 $\pm$ 0.01               | 0.33 $\pm$ 0.01               |
|                      | (2 h)    | ND                        | 2.43 $\pm$ 1.30               | 17.62 $\pm$ 0.74              | 0.17 $\pm$ 0.03               | 0.59 $\pm$ 0.04               |
|                      | (6 h)    | ND                        | 2.50 $\pm$ 0.30               | 6.75 $\pm$ 0.99               | 0.203 $\pm$ 0.004             | 0.62 $\pm$ 0.02               |
|                      | 1        | ND                        | 4.58 $\pm$ 0.23               | 4.13 $\pm$ 3.59               | 0.27 $\pm$ 0.01               | 0.30 $\pm$ 0.03               |
|                      | 2        | ND                        | 3.74 $\pm$ 0.66               | 9.76 $\pm$ 0.54               | 0.21 $\pm$ 0.02               | 0.46 $\pm$ 0.04               |
|                      | 3        | ND                        | 2.14 $\pm$ 0.40               | 8.99 $\pm$ 0.51               | 0.182 $\pm$ 0.001             | 0.31 $\pm$ 0.04               |
|                      | 5        | ND                        | 1.91 $\pm$ 0.55               | 7.15 $\pm$ 0.61               | 0.27 $\pm$ 0.01               | 0.31 $\pm$ 0.01               |
|                      | 7        | ND                        | 0.72 $\pm$ 0.04               | 7.37 $\pm$ 0.10               | 0.51 $\pm$ 0.11               | 1.08 $\pm$ 0.02               |
|                      | 9        | ND                        | 3.93 $\pm$ 0.49               | 11.71 $\pm$ 0.94              | 0.29 $\pm$ 0.01               | 0.57 $\pm$ 0.03               |
|                      | 11       | ND                        | 3.05 $\pm$ 0.43               | 4.28 $\pm$ 0.41               | 0.27 $\pm$ 0.02               | 0.49 $\pm$ 0.04               |
|                      | 15       | ND                        | 5.32 $\pm$ 0.16               | 8.87 $\pm$ 3.23               | 0.18 $\pm$ 0.02               | 0.80 $\pm$ 0.03               |
|                      | 21       | ND                        | 3.32 $\pm$ 0.30               | 5.96 $\pm$ 0.81               | 0.24 $\pm$ 0.03               | 0.52 $\pm$ 0.03               |
|                      | 28       | ND                        | 6.02 $\pm$ 0.72               | 13.83 $\pm$ 1.17              | 0.30 $\pm$ 0.02               | 0.60 $\pm$ 0.02               |

ND = not detected.
